# Supplementary material
Source: publisher figshare collection journal article supplement (https://tandf.figshare.com/ndownloader/files/13205540)
Supplement: Supplementary file 1 [file 13205540]

Supplementary Table 1: Articles reporting IACUC approval in *Anthrozoos* listed in chronological order

| Author | Title | Year | Journal | Species |
| --- | --- | --- | --- | --- |
| Ribi, F. N., Yokoyama, A., & Turner, D. C. | Comparison of children's behavior toward sony's robotic dog AIBO and a real dog: a pilot study | 2008 | Anthrozoos | Dog |
| O'Haire, M. E., McKenzie, S. J., McCune, S., & Slaughter, V. | Effects of animal-assisted activities with guinea pigs in the primary school classroom | 2013 | Anthrozoos | Guinea Pig |
| Gee, N. R., Friedmann, E., Stendahl, M., Fisk, A., & Coglitore, V. | Heart rate variability during a working memory task: does touching a dog or person affect the response? | 2014 | Anthrozoos | Dog |
| Crossman, M. K., Kazdin, A. E., & Knudson, K. | Brief unstructured interaction with a dog reduces distress | 2015 | Anthrozoos | Dog |
| Gee, N. R., Friedmann, E., Coglitore, V., Fisk, A., & Stendahl, M. | Does physical contact with a dog or person affect performance of a working memory task? | 2015 | Anthrozoos | Dog |

Supplementary Table 2: Articles reporting IACUC approval in all other journals listed in chronological order

| Author | Title | Year | Journal | Species |
| --- | --- | --- | --- | --- |
| Jessen, J., Cardiello, F., & Baun, M. M. | Avian companionship in alleviation of depression, loneliness, and low morale of older adults in skilled rehabilitation units | 1996 | Psychologic Reports | Bird |
| Churchill, M., Safaoui, J., McCabe, B. W., & Baun, M. M. | Using a therapy dog to alleviate the agitation and desocialization of people with Alzheimer's disease. | 1999 | Journal Psychosoc Nurs Ment Health Serv | Dog |
| Edwards, N. E., & Beck, A. M. | Animal-assisted therapy and nutrition in Alzheimer's disease | 2002 | Western Journal of Nursing Research | Fish |
| Lust, E., Ryan-Haddad, A., Coover, K., & Snell, J. | Measuring clinical outcomes of animal-assisted therapy: impact on resident medication usage. | 2007 | Consultant Pharmacist | Dog |
| Cerulli, C., Minganti, C., De Santis, C., Tranchita, E., Quaranta, F., & Parisi, A. | Therapeutic horseback riding in breast cancer survivors: a pilot study. | 2014 | *J Altern Complement Med* | Horse |
| Hediger, K., & Turner, D. C. | Can dogs increase children's attention and concentration performance? A randomised controlled trial | 2014 | Human-Animal Interaction Bulletin | Dog |
| Pendry, P., Carr, A. M., Smith, A. N., & Roeter, S. M. | Improving adolescent social competence and behavior: a randomized trial of an 11-week equine facilitated learning prevention program | 2014 | J Prim Prev | Horse |
| Calcaterra, V., Veggiotti, P., Palestrini, C., De Giorgis, V., Raschetti, R., Tumminelli, M., . . . Pelizzo, G. | Post-operative benefits of animal-assisted therapy in pediatric surgery: a randomised study. | 2015 | *PLoS One* | Dog |
| Calvo, P., Fortuny, J. R., Guzmán, S., Macías, C., Bowen, J., García, M. L., . . . Fatjó, J. | Animal assisted therapy (AAT) program as a useful adjunct to conventional psychosocial rehabilitation for patients with schizophrenia: Results of a small-scale randomized controlled trial | 2016 | Frontiers in Psychology | Dog |
| Grubbs, B., Artese, A., Schmitt, K., Cormier, E., & Panton, L. | A Pilot Study to Assess the Feasibility of Group Exercise and Animal-Assisted Therapy in Older Adults | 2016 | Journal of Aging & Physical Activity | Dog |
